# Supplementary material for: The mechanism and ligand effects of single atom rhodium supported on ZSM-5 for the selective oxidation of methane to methanol
Source: Royal Society of Chemistry journal article supplement (doi:10.1039/d0cp01284j), 2020-01-01

## Supporting Information

### The mechanism and ligand effects of single atom rhodium supported on ZSM-5 for the partial oxidation of methane to methanol

Rhys J. Bunting, Jillian Thompson, P. Hu\*

School of Chemistry and Chemical Engineering, Queen's University Belfast, David Keir Building,  
Stranmillis Road, Belfast, BT9 5AG

Corresponding Author:

\*p.hu@qub.ac.uk

#### Contents of Supporting Information:

Desorption free energies for CO and H<sub>2</sub>O on Rh@ZSM-5 - SI1

SI1: Desorption free energies for CO and H<sub>2</sub>O on Rh@ZSM-5:

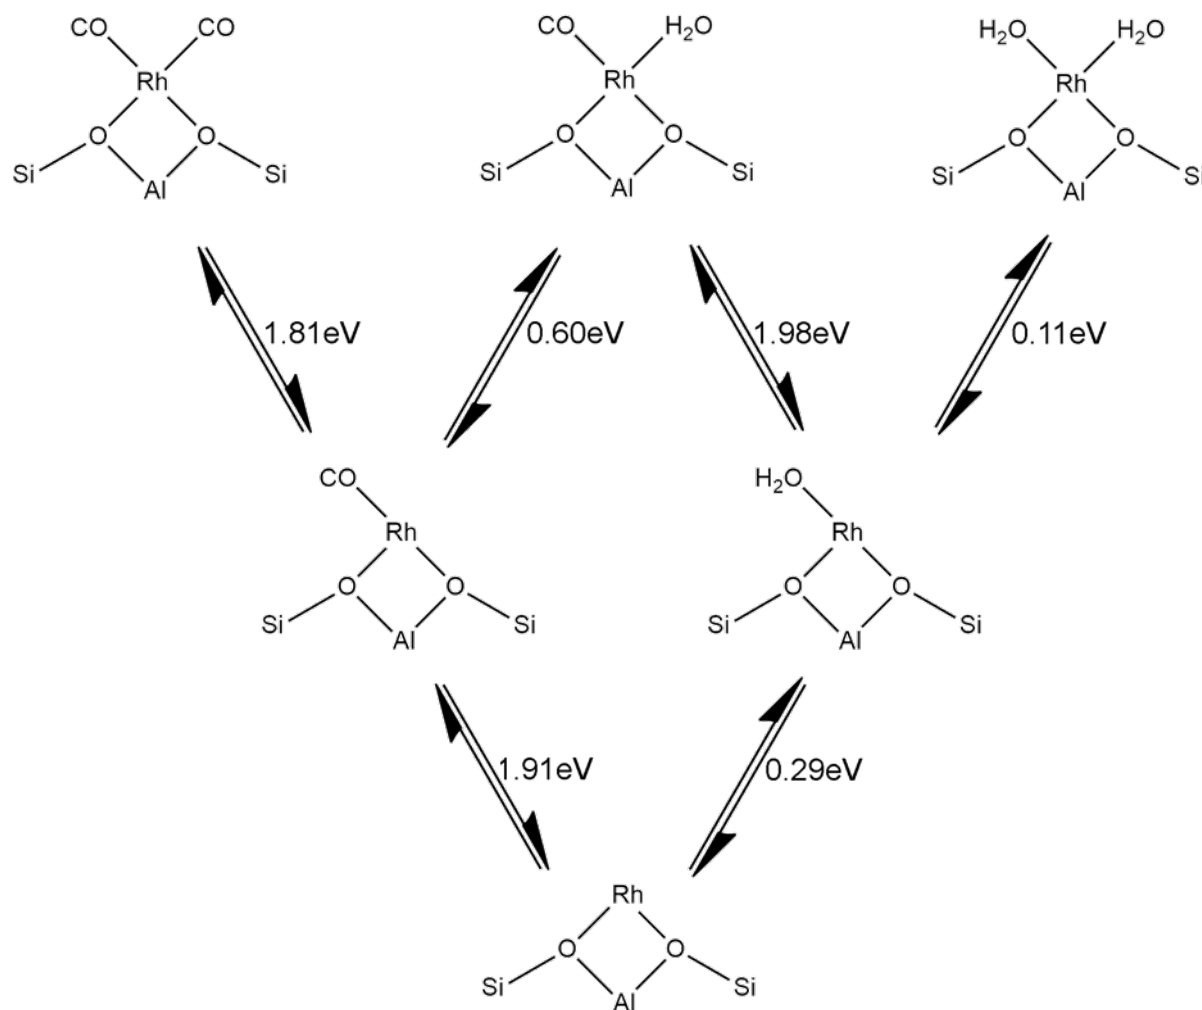

Supplement: d0cp01284j1.pdf [file d0cp01284j1.pdf]
